# Supplementary material for: Resolution-Sensitive Added Value Analysis of CORDEX-CORE RegCM4-7 Past Seasonal Precipitation Simulations over Africa Using Satellite-Based Observational Products
Source: MDPI journal article supplement (doi:10.3390/rs14092102), 2022-04-27
Supplement: s1 [file s1]

## Supplementary Materials

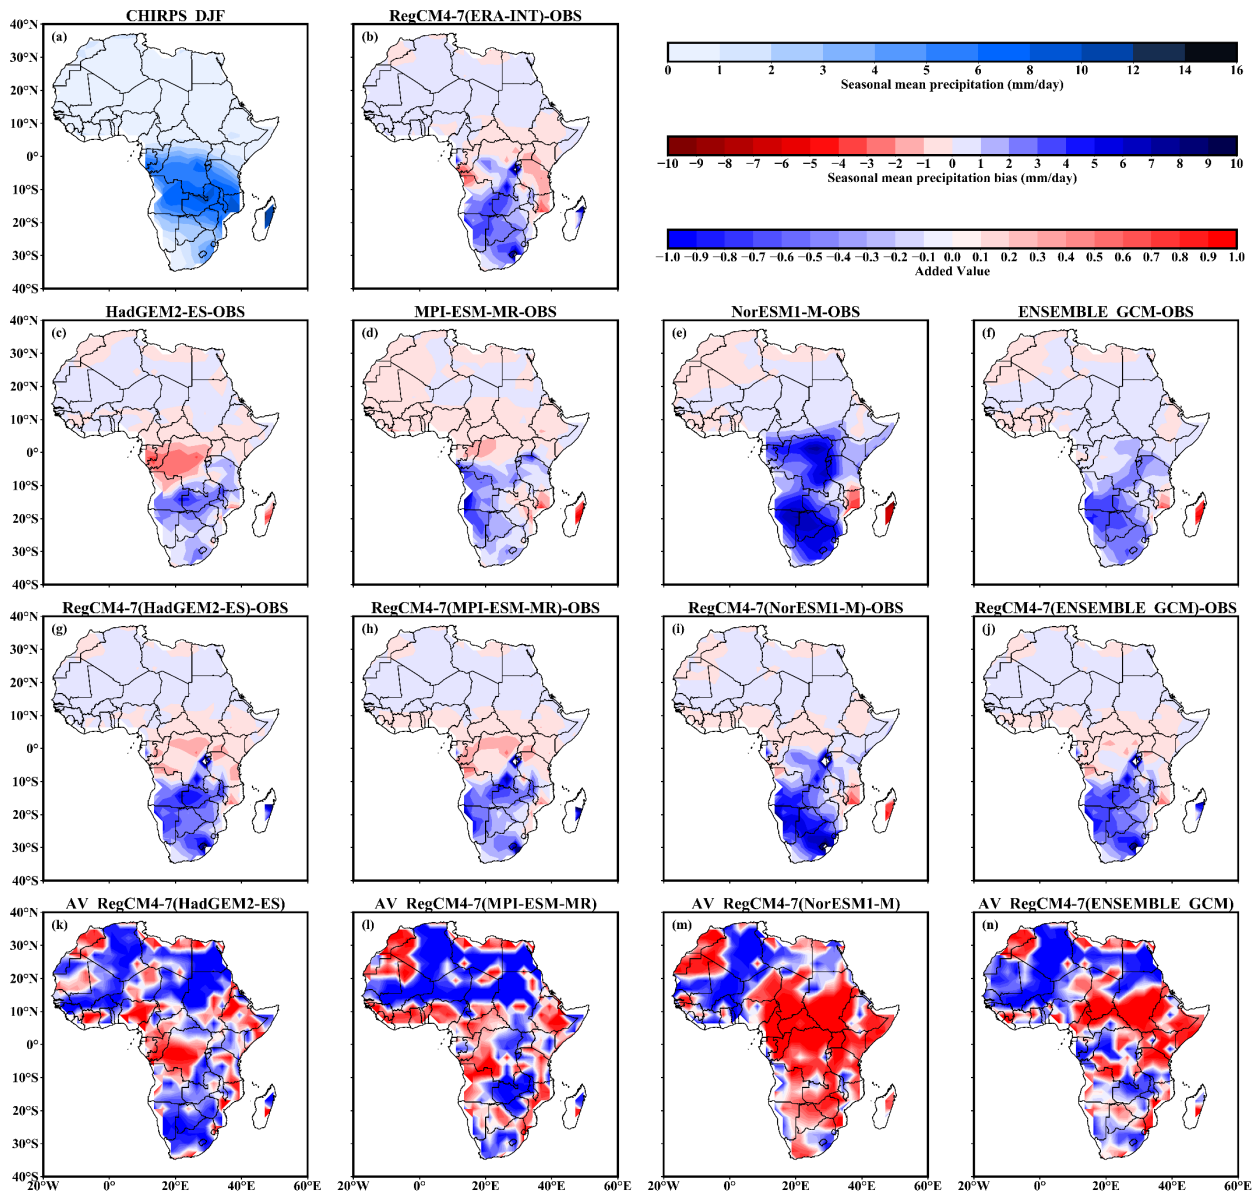

**Figure S1.** Performance of African precipitation in DJF season at low resolution compared to (a) CHIRPS, for (b) RegCM4-7 evaluation run driven by ERA-INT, (c) driving GCM HadGEM2-ES, (d) driving GCM MPI-ESM-MR, (e) driving GCM NorESM1-M, (f) ensemble mean of the driving GCMs, (g) RegCM4-7 historical run driven by HadGEM2-ES, (h) RegCM4-7 historical run driven by MPI-ESM-MR, (i) RegCM4-7 historical run driven by NorESM1-M, (j) RegCM4-7 historical runs' ensemble mean, (k) Added Value by RegCM4-7 to HadGEM2-ES, (l) Added Value by RegCM4-7 to MPI-ESM-MR, (m) Added Value by RegCM4-7 to NorESM1-M, (n) Added Value by RegCM4-7 to ensemble mean of the driving GCMs.

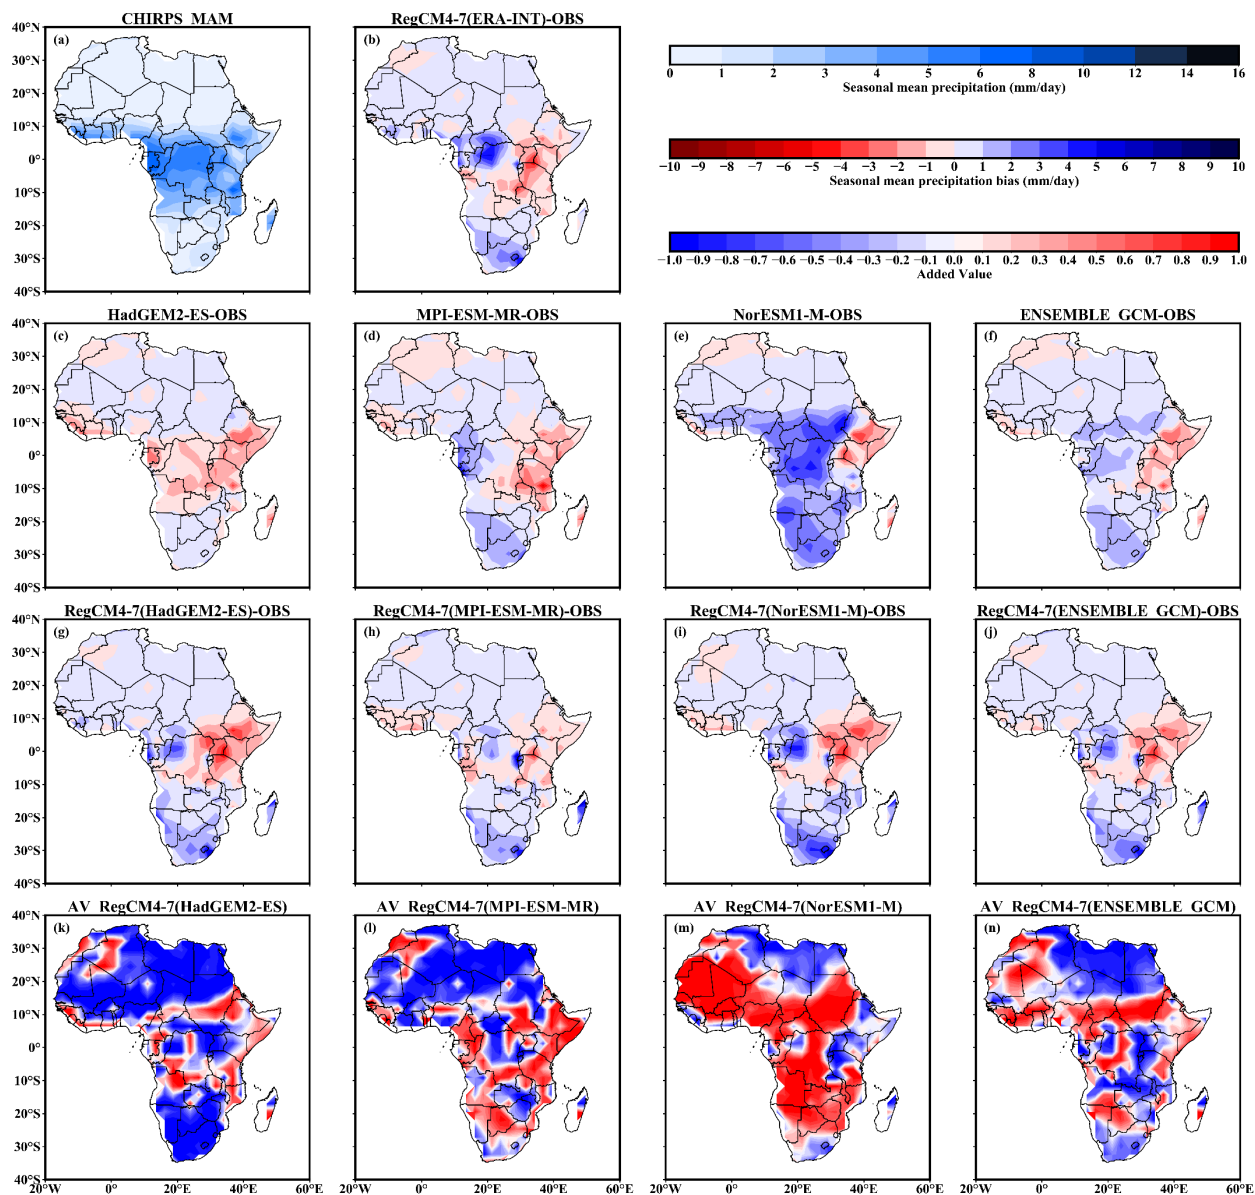

**Figure S2.** Performance of African precipitation in MAM season at low resolution compared to (a) CHIRPS, for (b) RegCM4-7 evaluation run driven by ERA-INT, (c) driving GCM HadGEM2-ES, (d) driving GCM MPI-ESM-MR, (e) driving GCM NorESM1-M, (f) ensemble mean of the driving GCMs, (g) RegCM4-7 historical run driven by HadGEM2-ES, (h) RegCM4-7 historical run driven by MPI-ESM-MR, (i) RegCM4-7 historical run driven by NorESM1-M, (j) RegCM4-7 historical runs' ensemble mean, (k) Added Value by RegCM4-7 to HadGEM2-ES, (l) Added Value by RegCM4-7 to MPI-ESM-MR, (m) Added Value by RegCM4-7 to NorESM1-M, (n) Added Value by RegCM4-7 to ensemble mean of the driving GCMs.

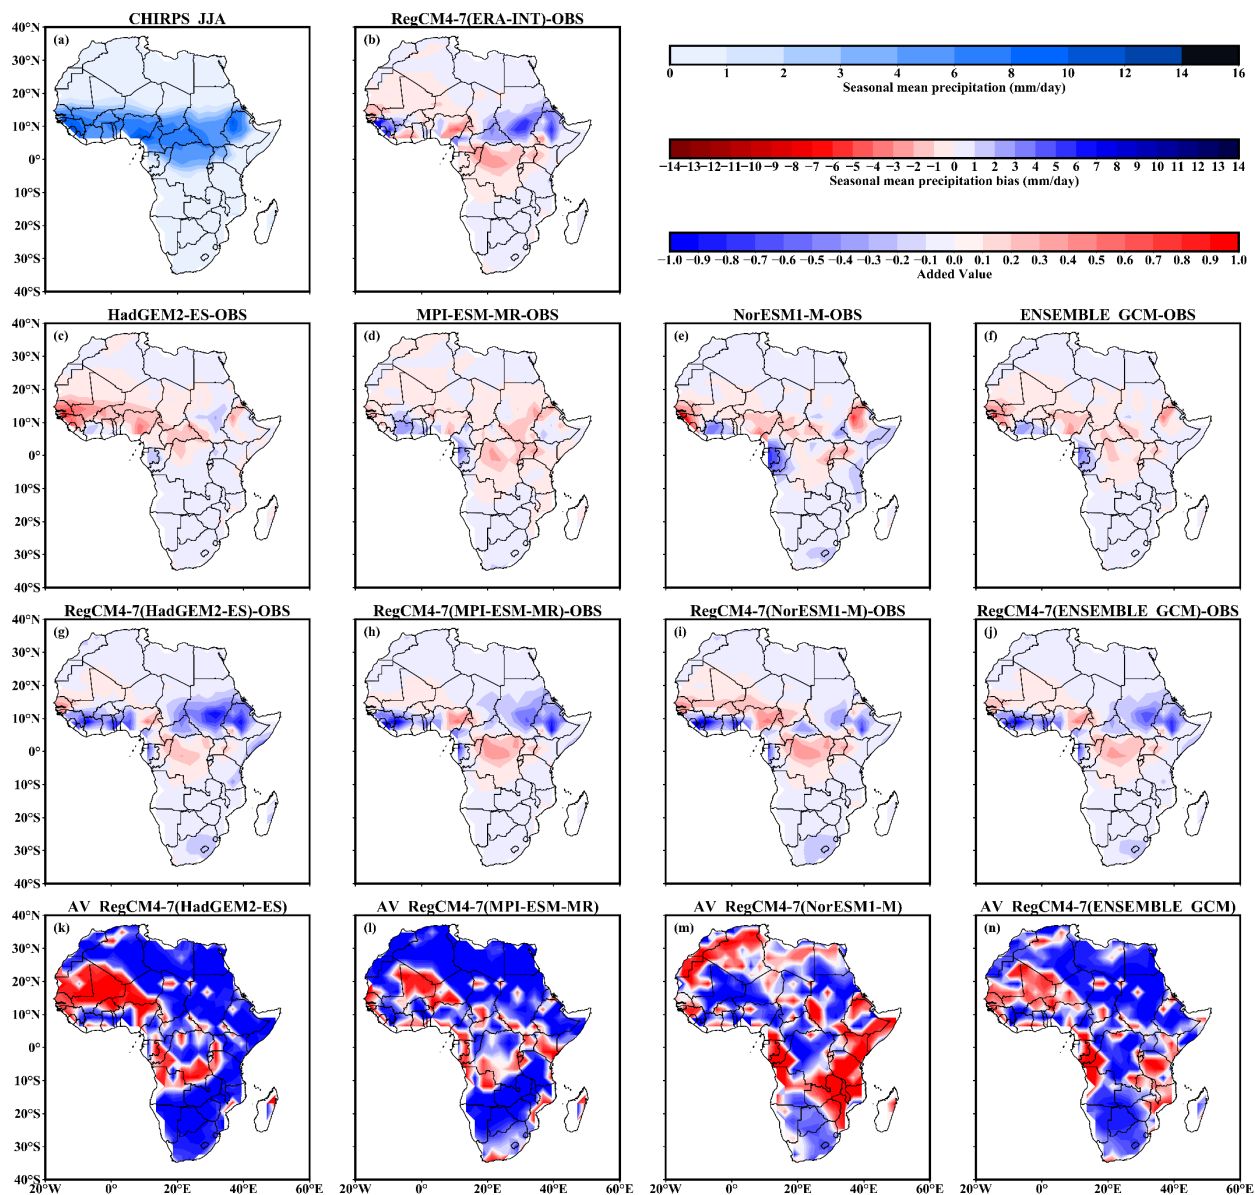

**Figure S3.** Performance of African precipitation in JJA season at low resolution compared to (a) CHIRPS, for (b) RegCM4-7 evaluation run driven by ERA-INT, (c) driving GCM HadGEM2-ES, (d) driving GCM MPI-ESM-MR, (e) driving GCM NorESM1-M, (f) ensemble mean of the driving GCMs, (g) RegCM4-7 historical run driven by HadGEM2-ES, (h) RegCM4-7 historical run driven by MPI-ESM-MR, (i) RegCM4-7 historical run driven by NorESM1-M, (j) RegCM4-7 historical runs' ensemble mean, (k) Added Value by RegCM4-7 to HadGEM2-ES, (l) Added Value by RegCM4-7 to MPI-ESM-MR, (m) Added Value by RegCM4-7 to NorESM1-M, (n) Added Value by RegCM4-7 to ensemble mean of the driving GCMs.

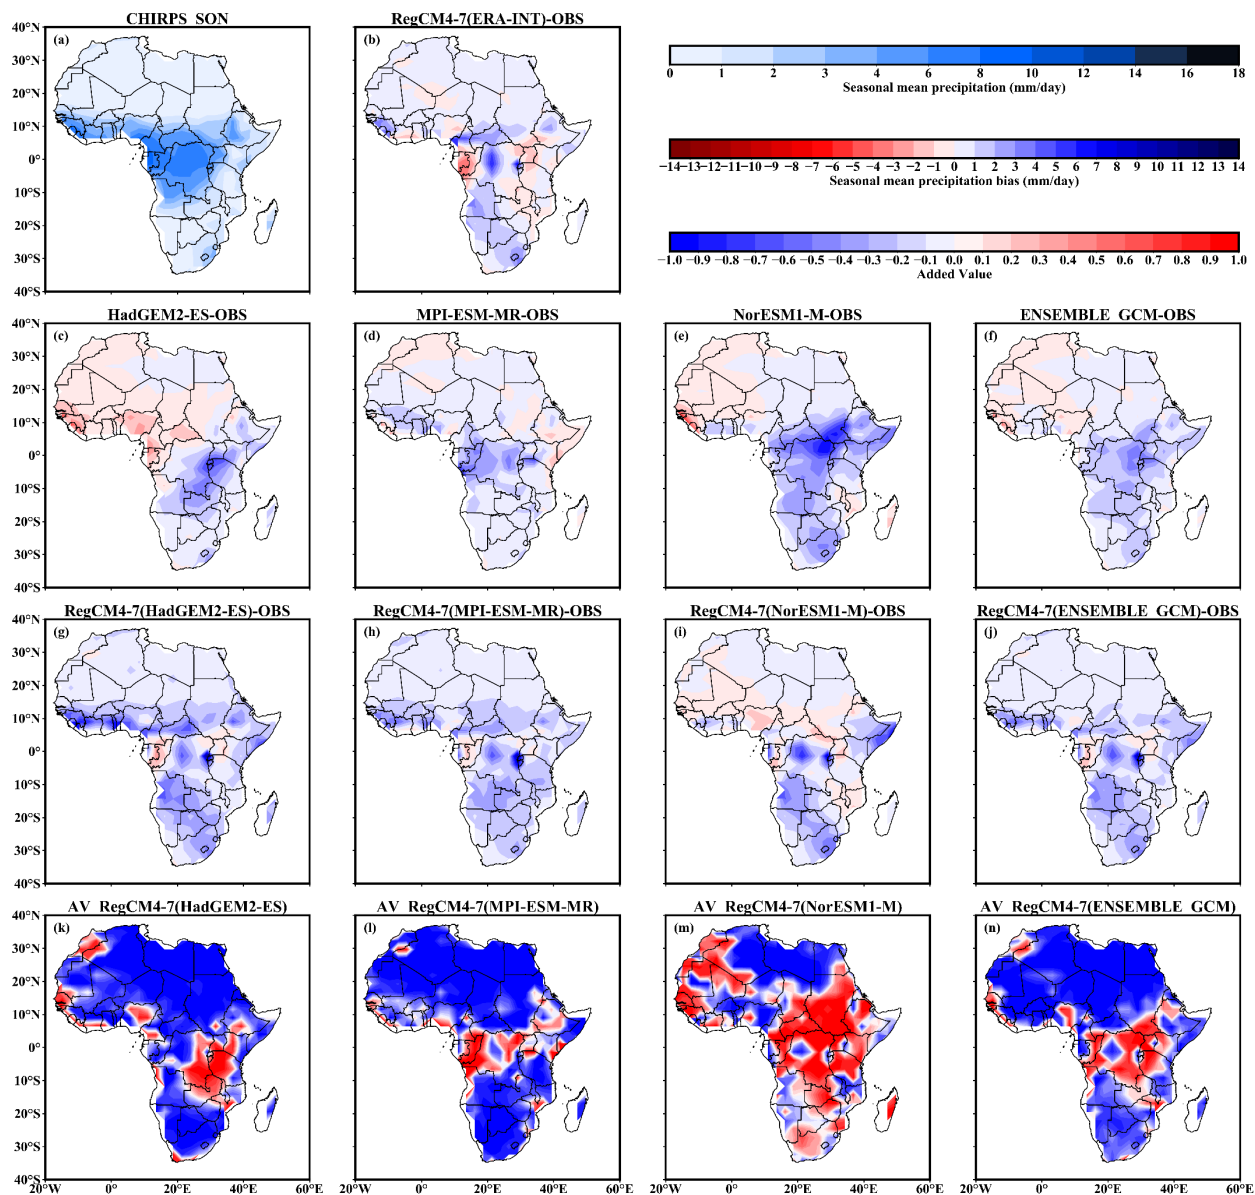

**Figure S4.** Performance of African precipitation in SON season at low resolution compared to (a) CHIRPS, for (b) RegCM4-7 evaluation run driven by ERA-INT, (c) driving GCM HadGEM2-ES, (d) driving GCM MPI-ESM-MR, (e) driving GCM NorESM1-M, (f) ensemble mean of the driving GCMs, (g) RegCM4-7 historical run driven by HadGEM2-ES, (h) RegCM4-7 historical run driven by MPI-ESM-MR, (i) RegCM4-7 historical run driven by NorESM1-M, (j) RegCM4-7 historical runs' ensemble mean, (k) Added Value by RegCM4-7 to HadGEM2-ES, (l) Added Value by RegCM4-7 to MPI-ESM-MR, (m) Added Value by RegCM4-7 to NorESM1-M, (n) Added Value by RegCM4-7 to ensemble mean of the driving GCMs.

**Table S1.** Added Value Coverage results of RegCM4-7 simulations over continental Africa at low resolution for CHIRPS data (LR\_C) and for GPCP data (LR\_G).

|     |                       | Negative AVC |        | Non-significant AVC |        | Positive AVC |        |
|-----|-----------------------|--------------|--------|---------------------|--------|--------------|--------|
|     |                       | LR_C         | LR_G   | LR_C                | LR_G   | LR_C         | LR_G   |
| DJF | RegCM4(HadGEM2-ES)    | 52.08%       | 73.67% | 26.36%              | 5.67%  | 21.56%       | 20.65% |
|     | RegCM4(MPI-ESM-MR)    | 53.73%       | 30.66% | 7.45%               | 8.9%   | 38.82%       | 60.44% |
|     | RegCM4(NorESM1-M)     | 43.4%        | 37.91% | 0%                  | 7.55%  | 56.6%        | 54.53% |
|     | RegCM4(ENSEMBLE_GCMS) | 60.55%       | 42%    | 2.77%               | 7.55%  | 35.68%       | 50.45% |
| MAM | RegCM4(HadGEM2-ES)    | 75.43%       | 41.76% | 0%                  | 9.16%  | 24.57%       | 49.08% |
|     | RegCM4(MPI-ESM-MR)    | 56.28%       | 43.7%  | 5%                  | 8.85%  | 38.72%       | 47.44% |
|     | RegCM4(NorESM1-M)     | 41.18%       | 51.92% | 0.37%               | 8.47%  | 58.45%       | 39.6%  |
|     | RegCM4(ENSEMBLE_GCMS) | 51.6%        | 67.31% | 1.23%               | 8.31%  | 47.17%       | 24.39% |
| JJA | RegCM4(HadGEM2-ES)    | 53.52%       | 49.21% | 1.16%               | 6.51%  | 45.32%       | 44.28% |
|     | RegCM4(MPI-ESM-MR)    | 32.3%        | 43.15% | 0%                  | 6.96%  | 67.7%        | 49.89% |
|     | RegCM4(NorESM1-M)     | 26.66%       | 26.37% | 14.25%              | 10.87% | 59.09%       | 62.76% |
|     | RegCM4(ENSEMBLE_GCMS) | 41.04%       | 39.7%  | 0.42%               | 6.17%  | 58.53%       | 54.13% |
| SON | RegCM4(HadGEM2-ES)    | 49.14%       | 57.08% | 4.3%                | 6.96%  | 46.56%       | 35.96% |
|     | RegCM4(MPI-ESM-MR)    | 77.47%       | 75.8%  | 0%                  | 5.7%   | 22.53%       | 18.5%  |
|     | RegCM4(NorESM1-M)     | 37.2%        | 43.64% | 0.13%               | 7.15%  | 62.67%       | 49.21% |
|     | RegCM4(ENSEMBLE_GCMS) | 55.54%       | 57.22% | 0.09%               | 6.48%  | 44.37%       | 36.3%  |
