# Supplementary material for: Resolution-Sensitive Added Value Analysis of CORDEX-CORE RegCM4-7 Past Seasonal Precipitation Simulations over Africa Using Satellite-Based Observational Products
Source: MDPI journal article supplement (doi:10.3390/rs14092102), 2022-04-27
Supplement: s1 [file s1]

Archive with 1 entries (1 files):
- remotesensing-1642012-supplementary.pdf
